# Supplementary material for: Superspreading and the effect of individual variation on disease emergence
Source: Springer Nature journal article supplement (doi:10.1038/nature04153), 2005-11-16
Supplement: 41586_2005_BFnature04153_MOESM3_ESM.pdf [file 41586_2005_BFnature04153_MOESM3_ESM.pdf]

**Supplementary Table 1. Summary of model selection and parameter estimation for transmission data from uncontrolled outbreaks**

| Dataset                                | Model | $\Delta AIC_c$ | Akaike weight | Negative binomial parameters       |                         |                    |
|----------------------------------------|-------|----------------|---------------|------------------------------------|-------------------------|--------------------|
|                                        |       |                |               | $\hat{R}_0$ or $\hat{R}$<br>90% CI | $\hat{k}$<br>90% CI     | $t_{20}$<br>90% CI |
| SARS                                   | P     | 250.4          | 0             | 1.63 <sup>†</sup>                  | 0.16                    | 0.88               |
| Singapore 2003                         | G     | 41.2           | 0             | 0.54-2.65                          | 0.11-0.64               | 0.60-0.94          |
| $N=57$                                 | NB    | 0              | 1             |                                    |                         |                    |
| SARS                                   | P     | 49.2           | 0             | 0.94 <sup>†</sup>                  | 0.17                    | 0.87               |
| Beijing 2003                           | G     | 10.6           | 0             | 0.27-1.51                          | 0.10-0.64               | 0.60-0.95          |
| $N=33$                                 | NB    | 0              | 1             |                                    |                         |                    |
| Measles <sup>v95</sup>                 | P     | -              | -             | 0.63 <sup>#</sup>                  | 0.23                    | 0.81               |
| US 1997-1999                           | G     | -              | -             | 0.47-0.80                          | 0.16-0.39 <sup>pz</sup> | 0.70-0.92          |
| $N=165^{s,pz}$                         | NB    | -              | -             |                                    |                         |                    |
| Measles <sup>v95?</sup>                | P     | -              | -             | 0.82 <sup>#</sup>                  | 0.21                    | 0.83               |
| Canada 1998-2001                       | G     | -              | -             | 0.72-0.98                          | 0.12-0.65 <sup>pz</sup> | 0.64-0.96          |
| $N=49^{s,pz}$                          | NB    | -              | -             |                                    |                         |                    |
| Smallpox (V. major) <sup>v80?</sup>    | P     | 129.3          | 0             | 3.19                               | 0.37                    | 0.71               |
| Europe 1958-1973                       | G     | 7.4            | 0.02          | 1.66-4.62                          | 0.26-0.69               | 0.59-0.79          |
| $N=32^s$                               | NB    | 0              | 0.98          |                                    |                         |                    |
| Smallpox (V. major) <sup>v20-70</sup>  | P     | 13.0           | 0             | 0.80                               | 0.32                    | 0.74               |
| Benin 1967                             | G     | 0.8            | 0.45          | 0.32-1.20                          | 0.16-1.76               | 0.44-0.88          |
| $N=25$                                 | NB    | 0              | 0.55          |                                    |                         |                    |
| Smallpox (V. major) <sup>v</sup>       | P     | -              | -             | 1.49 <sup>#</sup>                  | 0.72                    | 0.58               |
| W. Pakistan                            | G     | -              | -             |                                    | 0.44-2.05 <sup>pz</sup> | 0.41-0.74          |
| $N=47^{s,pz}$                          | NB    | -              | -             |                                    |                         |                    |
| Smallpox (V. minor) <sup>v50-70?</sup> | P     | 16.4           | 0             | 1.60                               | 0.65                    | 0.60               |
| England 1966                           | G     | 0              | 0.71          | 0.88-2.16                          | 0.34-2.32               | 0.41-0.73          |
| $N=25$                                 | NB    | 1.7            | 0.29          |                                    |                         |                    |
| Monkeypox <sup>v70</sup>               | P     | 10.6           | 0             | 0.32                               | 0.58                    | 0.62               |
| Zaire 1980-84                          | G     | 0              | 0.62          | 0.22-0.40                          | 0.32-3.57               | 0.36-0.74          |
| $N=147^s$                              | NB    | 1.0            | 0.37          |                                    |                         |                    |
| Pneumonic plague                       | P     | 15.5           | 0             | 1.32                               | 1.37                    | 0.47               |
| 6 outbreaks                            | G     | 0              | 0.67          | 1.01-1.61                          | 0.88-3.53               | 0.37-0.54          |
| $N=74$                                 | NB    | 1.5            | 0.33          |                                    |                         |                    |
| Hantavirus (Andes virus)*              | P     | 1.0            | 0.31          | 0.70                               | 1.66                    | 0.45               |
| Argentina 1996                         | G     | 0              | 0.52          | 0.20-1.05                          | 0.24- $\infty$          | 0.20-0.80          |
| $N=20$                                 | NB    | 2.3            | 0.17          |                                    |                         |                    |
| Ebola HF*                              | P     | 0              | 0.56          | 1.50                               | 5.10                    | 0.34               |
| Uganda 2000                            | G     | 1.4            | 0.28          | 0.85-2.08                          | 1.46- $\infty$          | 0.20-0.46          |
| $N=13$                                 | NB    | 2.4            | 0.17          |                                    |                         |                    |

from:

Superspreading and the impact of individual variation on disease emergence  
J.O. Lloyd-Smith, S.J. Schreiber, P.E. Kopp, W.M. Getz

## Table notes

P, Poisson; G, geometric; NB, negative binomial offspring distribution.

$\Delta\text{AIC}_c$ , Akaike information criterion, modified for sample size, relative to lowest score.

Akaike weight, approximate probability that each model is the best of the models considered.

$\hat{R}_0$  (or  $\hat{R}$ ) and  $\hat{k}$ , maximum likelihood estimates of mean and dispersion parameter of negative binomial distribution, from full observed distribution of  $Z$  except where noted.

$t_{20}$ , expected proportion of transmission due to most infectious 20% of cases, calculated from  $\hat{k}$ .

90% CI, bootstrap confidence intervals based on 10,000 resamples and bias-corrected non-parametric percentile method.

$N$ , number of infectious individuals in dataset.

$v^{XX}$  vaccinated population with XX% coverage ( ? coverage estimated or unknown).

\*results should be interpreted with caution due to small sample size, incomplete contact tracing, or atypical nature of outbreak.

<sup>s</sup>surveillance data.

<sup>pz</sup>only mean of  $Z$  and proportion of zeros known. Estimation of  $\hat{k}$  and confidence interval on  $\hat{k}$  described in Supplementary Notes; AIC model selection was not possible.

<sup>†</sup>see Supplementary Notes for relation to other  $R_0$  estimates for SARS.

<sup>#</sup> $R_0$  from source article (including 95% CI when given).

Data and analysis described in the Supplementary Notes and Supplementary Table 2.
