# Supplementary material for: Superspreading and the effect of individual variation on disease emergence
Source: Springer Nature journal article supplement (doi:10.1038/nature04153), 2005-11-16
Supplement: 41586_2005_BFnature04153_MOESM4_ESM.pdf [file 41586_2005_BFnature04153_MOESM4_ESM.pdf]

## Supplementary Table 2. Results of data analyses

### Uncontrolled outbreaks

| <u>Parameter estimation</u>                            | SARS,<br>Singapore | SARS, Beijing<br>(gen 2 only) | SARS, Beijing<br>(gens 1 and 2) | Measles,<br>USA | Measles,<br>Canada | Pneumonic<br>plague,<br>6 outbreaks | Hantavirus,<br>Argentina |            |           |
|--------------------------------------------------------|--------------------|-------------------------------|---------------------------------|-----------------|--------------------|-------------------------------------|--------------------------|------------|-----------|
| <i>N</i>                                               | 57                 | 33                            | 34                              | 165             | 49                 | 74                                  | 20                       |            |           |
| mean ( <i>R</i> <sub>0</sub> or <i>R</i> )             | 1.63               | 0.94                          | 1.88                            | 0.63            | 0.82               | 1.32                                | 0.7                      |            |           |
| <i>k</i> <sub>mle</sub>                                | 0.16               | 0.17                          | 0.12                            |                 |                    | 1.37                                | 1.66                     |            |           |
| <i>k</i> <sub>pz</sub>                                 | 0.17               | 0.17                          | 0.13                            |                 |                    | 1.25                                | 1.94                     |            |           |
| var( <i>Z</i> )/mean( <i>Z</i> )                       | 15.31              | 5.45                          | 18.7                            |                 |                    | 1.84                                | 1.52                     |            |           |
| Number of zeros in dataset ( <i>Z</i> =0)              | 38                 | 24                            | 24                              |                 |                    | 122                                 | 35                       | 30         | 11        |
| <i>p</i> <sub>0</sub>                                  | 0.6667             | 0.7273                        | 0.7059                          | 0.7394          | 0.7143             | 0.4054                              | 0.5500                   |            |           |
| Binomial 90CI on <i>p</i> <sub>0</sub>                 | 0.5503,0.7695      | 0.5724,0.8497                 | 0.5524,0.8309                   | 0.6772, 0.7950  | 0.5899,0.8183      | 0.3090,0.5076                       | 0.3469,0.7414            |            |           |
| <b><u>Model selection</u></b>                          |                    |                               |                                 |                 |                    |                                     |                          |            |           |
| ΔAIC(P)                                                | 250.4              | 49.2                          | 183.4                           |                 |                    | 15.5                                | 1                        |            |           |
| ΔAIC(G)                                                | 41.2               | 10.6                          | 31.4                            |                 |                    | 0                                   | 0                        |            |           |
| ΔAIC(NB)                                               | 0                  | 0                             | 0                               |                 |                    | 1.5                                 | 2.3                      |            |           |
| Akaike weight(P)                                       | 0                  | 0                             | 0                               |                 |                    | 0                                   | 0.31                     |            |           |
| Akaike weight(G)                                       | 0                  | 0                             | 0                               |                 |                    | 0.67                                | 0.52                     |            |           |
| Akaike weight(NB)                                      | 1                  | 1                             | 1                               |                 |                    | 0.33                                | 0.17                     |            |           |
| P-W test <i>p</i> -value                               | <1e-6              | <1e-6                         | <1e-6                           |                 |                    | 1.6e-5                              | 0.068                    |            |           |
| <b><u>90% Confidence intervals for <i>k</i></u></b>    |                    |                               |                                 |                 |                    |                                     |                          |            |           |
| Non-parametric bootstrap (uncorrected)                 | 0.10, 0.36         | 0.08, 0.46                    | 0.06, 0.31                      |                 |                    |                                     |                          | 0.82, 3.00 | 0.46, inf |
| 1. Non-parametric bootstrap (bias-corrected)           | 0.11, 0.64         | 0.10, 0.64                    | 0.08, 0.42                      |                 |                    |                                     |                          | 0.88, 3.53 | 0.65, inf |
| Number of all-zero bootstrap datasets                  | 0                  | 0                             | 0                               |                 |                    |                                     |                          | 0          | 0         |
| Parametric bootstrap (uncorrected)                     | 0.09, 0.28         | 0.08, 0.49                    | 0.06, 0.27                      |                 |                    |                                     |                          | 0.80, 3.61 | 0.44, inf |
| 2. Parametric bootstrap (bias-corrected)               | 0.10, 0.30         | 0.11, 0.78                    | 0.08, 0.33                      | 0.88, 4.58      | 0.68, inf          |                                     |                          |            |           |
| Number of all-zero bootstrap datasets                  | 0                  | 1                             | 0                               | 0               | 0                  |                                     |                          |            |           |
| 3. Maximum-likelihood sampling variance                | 0.10, 0.32         | 0.10, 0.79                    | 0.07, 0.37                      |                 |                    | 0.84, 3.86                          | 0.54, inf                |            |           |
| 4. Large-sample variance on <i>k</i> <sub>pz</sub>     | 0.11, 0.36         | 0.09, 0.80                    | 0.07, 0.38                      |                 |                    | 0.16, 0.39                          | 0.12, 0.65               | 0.75, 3.76 | 0.57, inf |
| 5. Binomial sampling variance on <i>p</i> <sub>0</sub> | 0.09, 0.34         | 0.06, 0.58                    | 0.05, 0.30                      |                 |                    | 0.13, 0.44                          | 0.08, 0.64               | 0.56, 5.12 | 0.20, inf |

#### Legend

Quantity cannot be calculated with available data

From:

Superspreading and the impact of individual variation on disease emergence

J.O. Lloyd-Smith, S.J. Schreiber, P.E. Kopp, W.M. Getz

## Uncontrolled outbreaks (cont'd)

| <u>Parameter estimation</u>                            | Smallpox surveillance, Europe | Smallpox, Benin | Smallpox, W. Pakistan | Variola minor, England | Monkeypox surveillance, Zaire | Rubella, Hawaii* | Ebola HF, Uganda |
|--------------------------------------------------------|-------------------------------|-----------------|-----------------------|------------------------|-------------------------------|------------------|------------------|
| <i>N</i>                                               | 32                            | 25              | 47                    | 25                     | 147                           | 19               | 13               |
| mean ( <i>R</i> <sub>0</sub> or <i>R</i> )             | 3.19                          | 0.8             | 1.49                  | 1.6                    | 0.32                          | 1                | 1.5              |
| <i>k</i> <sub>mle</sub>                                | 0.37                          | 0.32            |                       | 0.65                   | 0.58                          | 0.032            | 5.1              |
| <i>k</i> <sub>pz</sub>                                 | 0.42                          | 0.29            | 0.72                  | 0.53                   | 0.58                          | 0.032            | 2.31             |
| var( <i>Z</i> )/mean( <i>Z</i> )                       | 8.73                          | 2.81            |                       | 2.71                   | 1.58                          | 17               | 1.37             |
| Number of zeros in dataset ( <i>Z</i> =0)              | 13                            | 17              | 21                    | 12                     | 114                           | 17               | 4                |
| <i>p</i> <sub>0</sub>                                  | 0.4063                        | 0.6800          | 0.4468                | 0.4800                 | 0.7755                        | 0.8947           | 0.3077           |
| Binomial 90CI on <i>p</i> <sub>0</sub>                 | 0.2597,0.5665                 | 0.4964,0.8297   | 0.3223,0.5766         | 0.3051,0.6586          | 0.7116,0.8309                 | 0.7042,0.9810    | 0.1127,0.5726    |
| <b><u>Model selection</u></b>                          |                               |                 |                       |                        |                               |                  |                  |
| ΔAIC(P)                                                | 129.3                         | 13              |                       | 16.4                   | 10.6                          | 83.5             | 0                |
| ΔAIC(G)                                                | 7.4                           | 0.8             |                       | 0                      | 0                             | 25.4             | 1.4              |
| ΔAIC(NB)                                               | 0                             | 0               |                       | 1.7                    | 1                             | 0                | 2.4              |
| Akaike weight(P)                                       | 0                             | 0               |                       | 0                      | 0                             | 0                | 0.56             |
| Akaike weight(G)                                       | 0.02                          | 0.45            |                       | 0.71                   | 0.62                          | 0                | 0.28             |
| Akaike weight(NB)                                      | 0.98                          | 0.55            |                       | 0.29                   | 0.37                          | 1                | 0.17             |
| P-W test <i>p</i> -value                               | <1e-6                         | 5e-6            |                       | 1.2e-5                 | 8.6e-6                        | <1e-6            | 0.17             |
| <b><u>90% Confidence intervals for <i>k</i></u></b>    |                               |                 |                       |                        |                               |                  |                  |
| Non-parametric bootstrap (uncorrected)                 | 0.24, 0.63                    | 0.13, 1.20      |                       | 0.30, 1.91             | 0.29, 2.41                    |                  | 0.86, inf        |
| 1. Non-parametric bootstrap (bias-corrected)           | 0.26, 0.69                    | 0.16, 1.76      |                       | 0.34, 2.32             | 0.32, 3.57                    |                  | 1.48, inf        |
| Number of all-zero bootstrap datasets                  | 0                             | 1               |                       | 0                      | 0                             | 1192             | 0                |
| Parametric bootstrap (uncorrected)                     | 0.23, 0.71                    | 0.13, 1.95      |                       | 0.32, 2.28             | 0.30, 2.20                    |                  | 1.11, inf        |
| 2. Parametric bootstrap (bias-corrected)               | 0.26, 0.82                    | 0.18, inf       |                       | 0.40, 3.97             | 0.33, 3.57                    |                  | 1.91, inf        |
| Number of all-zero bootstrap datasets                  | 0                             | 0               |                       | 0                      | 0                             | 1397             | 0                |
| 3. Maximum-likelihood sampling variance                | 0.24, 0.83                    | 0.16, 11.2      |                       | 0.36, 3.32             | 0.32, 2.86                    | 0.013,inf        | 1.28, inf        |
| 4. Large-sample variance on <i>k</i> <sub>pz</sub>     | 0.27, 0.98                    | 0.15, 10.5      | 0.44, 2.05            | 0.29, 2.70             | 0.32, 2.97                    | 0.013,inf        | 0.76, inf        |
| 5. Binomial sampling variance on <i>p</i> <sub>0</sub> | 0.20, 0.88                    | 0.08, 2.69      | 0.32, 2.15            | 0.18, 2.08             | 0.18, inf                     | 0.003, 0.19      | 0.31, inf        |

### Legend

|                                                                                     |                                                                                      |
|-------------------------------------------------------------------------------------|--------------------------------------------------------------------------------------|
|  | Quantity cannot be calculated with available data                                    |
|  | >5% of bootstrap datasets contained all zeros                                        |
|  | Not shown in Supplementary Table 1 due to broad CIs and atypical nature of outbreak. |

From:

Superspreading and the impact of individual variation on disease emergence

J.O. Lloyd-Smith, S.J. Schreiber, P.E. Kopp, W.M. Getz

## Controlled outbreaks

|                                                        | <u>SARS, Singapore</u> |                | <u>SARS, Beijing</u> |                | <u>Pneumonic plague, Mukden</u> |                | <u>Smallpox, Kuwait</u> |                |
|--------------------------------------------------------|------------------------|----------------|----------------------|----------------|---------------------------------|----------------|-------------------------|----------------|
| <u>Parameter estimation</u>                            | Before control         | During control | Before control       | During control | Before control                  | During control | Before control          | During control |
| <i>N</i>                                               | 57                     | 114            | 33                   | 43             | 12                              | 27             | 4                       | 23             |
| mean ( <i>R</i> <sub>0</sub> or <i>R</i> )             | 1.63                   | 0.68           | 0.94                 | 0.28           | 2                               | 0.41           | 2.75                    | 0.91           |
| <i>k</i> <sub>mle</sub>                                | 0.16                   | 0.071          | 0.17                 | 0.0062         | 2.63                            | 0.32           | 2.64                    | 0.026          |
| <i>k</i> <sub>pz</sub>                                 | 0.17                   | 0.074          | 0.17                 | 0.0061         | 2                               | 0.28           |                         | 0.025          |
| var( <i>Z</i> )/mean( <i>Z</i> )                       | 15.31                  | 22.81          | 5.45                 | 12             | 1.82                            | 1.75           | 3                       | 10.25          |
| Number of zeros in dataset ( <i>Z</i> =0)              | 38                     | 96             | 24                   | 42             | 3                               | 21             | 0                       | 21             |
| <i>p</i> <sub>0</sub>                                  | 0.6667                 | 0.8421         | 0.7273               | 0.9767         | 0.2500                          | 0.7778         | 0.0000                  | 0.9130         |
| Binomial 90CI on <i>p</i> <sub>0</sub>                 | 0.5503,0.7695          | 0.7749,0.8954  | 0.5724,0.8497        | 0.8944,0.9988  | 0.0719,0.5273                   | 0.6079,0.8985  | 0,0.4377                | 0.7508,0.9843  |
| <b><u>Model selection</u></b>                          |                        |                |                      |                |                                 |                |                         |                |
| ΔAIC(P)                                                | 250.4                  | 318.1          | 49.2                 | 74.7           | 0.8                             | 3.8            | 0.8                     | 79.9           |
| ΔAIC(G)                                                | 41.2                   | 85.7           | 10.6                 | 37.8           | 0                               | 0              | 0                       | 29.4           |
| ΔAIC(NB)                                               | 0                      | 0              | 0                    | 0              | 1.8                             | 1.1            | 11.3                    | 0              |
| Akaike weight(P)                                       | 0                      | 0              | 0                    | 0              | 0.33                            | 0.09           | 0.4                     | 0              |
| Akaike weight(G)                                       | 0                      | 0              | 0                    | 0              | 0.48                            | 0.58           | 0.6                     | 0              |
| Akaike weight(NB)                                      | 1                      | 1              | 1                    | 1              | 0.2                             | 0.34           | 0                       | 1              |
| P-W test <i>p</i> -value                               | <1e-6                  | <1e-6          | <1e-6                | <1e-6          | 0.045                           | 0.011          | 0.029                   | <1e-6          |
| <b><u>90% Confidence intervals for <i>k</i></u></b>    |                        |                |                      |                |                                 |                |                         |                |
| Non-parametric bootstrap (uncorrected)                 | 0.10, 0.36             | 0.041, 0.28    | 0.08, 0.46           |                | 0.82, inf                       | 0.11, 1.52     | 1.86, inf               |                |
| 1. Non-parametric bootstrap (bias-corrected)           | 0.11, 0.64             | 0.049, 0.41    | 0.10, 0.64           |                | 1.26, inf                       | 0.12, 2.15     | 2.63, inf               |                |
| Number of all-zero bootstrap datasets                  | 0                      | 0              | 0                    | 3608           | 0                               | 13             | 0                       | 1219           |
| Parametric bootstrap (uncorrected)                     | 0.09, 0.28             | 0.042, 0.12    | 0.08, 0.49           |                | 0.86, inf                       | 0.11, inf      | 0.60, inf               |                |
| 2. Parametric bootstrap (bias-corrected)               | 0.10, 0.30             | 0.046, 0.13    | 0.11, 0.78           |                | 1.47, inf                       | 0.15, inf      | 2.96, inf               |                |
| Number of all-zero bootstrap datasets                  | 0                      | 0              | 1                    | 5612           | 0                               | 6              | 3                       | 1407           |
| 3. Maximum-likelihood sampling variance                | 0.10, 0.32             | 0.047, 0.15    | 0.10, 0.79           | 0.002, inf     | 0.97, inf                       | 0.14, inf      | 0.76, inf               | 0.01, inf      |
| 4. Large-sample variance on <i>k</i> <sub>pz</sub>     | 0.11, 0.36             | 0.049, 0.15    | 0.09, 0.80           | 0.002, inf     | 0.73, inf                       | 0.12, inf      |                         | 0.01, inf      |
| 5. Binomial sampling variance on <i>p</i> <sub>0</sub> | 0.09, 0.34             | 0.037, 0.15    | 0.06, 0.58           | 0.0002, 0.069  | 0.33, inf                       | 0.05, inf      | 0.40, inf               | 0.003, 0.14    |

### Legend

|  |                                                   |
|--|---------------------------------------------------|
|  | Quantity cannot be calculated with available data |
|  | >5% of bootstrap datasets contained all zeros     |
|  | One-tailed 90% CI reported                        |

From:

Superspreading and the impact of individual variation on disease emergence

J.O. Lloyd-Smith, S.J. Schreiber, P.E. Kopp, W.M. Getz
